# Supplementary material for: A Large-Scale Validation of an Improved Embryo-Rescue Protocol for the Obtainment of New Table-Grape Seedless Genotypes
Source: MDPI journal article supplement (doi:10.3390/plants12193469), 2023-10-03
Supplement: s1 [file s1]

**Supplementary material Table S1:** Numbers of ovules per berry and percentage of developed embryos in crosses between different grapevine genotypes at different sampling time.

| Ripening time* | Cross (♀ × ♂) | Features** | I    | II   | III  | IV   |
|----------------|---------------|------------|------|------|------|------|
| M              | TS01 × TS04   | Ov/Be      | 2.3  | 2.0  | n.a. | 2.5  |
|                |               | %E         | 4.0  | 4.1  | n.a. | 4.2  |
| M              | TS02 × TS04   | Ov/Be      | 1.9  | 1.6  | n.a. | 1.8  |
|                |               | %E         | 15.7 | 20.2 | n.a. | 10.8 |
| M              | TS11 × TS24   | Ov/Be      | n.a. | 2.3  | 2.1  | n.a. |
|                |               | %E         | n.a. | 7.6  | 13.7 | n.a. |
| M              | TS12 × TS24   | Ov/Be      | 1.8  | 1.5  | n.a. | n.a. |
|                |               | %E         | 3.6  | 10.0 | n.a. | n.a. |
| M              | TS13 × TS24   | Ov/Be      | 2.0  | 2.1  | n.a. | n.a. |
|                |               | %E         | 11.6 | 15.0 | n.a. | n.a. |
| M              | TS13 × TS24   | Ov/Be      | 2.0  | 2.0  | n.a. | n.a. |
|                |               | %E         | 10.6 | 12.2 | n.a. | n.a. |
| M              | TS13 × TS27   | Ov/Be      | n.a. | 1.7  | 2.1  | n.a. |
|                |               | %E         | n.a. | 4.2  | 3.4  | n.a. |
| M              | TS16 × TS27   | Ov/Be      | 1.9  | 2.0  | n.a. | 1.9  |
|                |               | %E         | 24.7 | 29.0 | n.a. | 46.9 |
| M              | TS27 × TS03   | Ov/Be      | n.a. | 3.5  | 3.4  | 2.9  |
|                |               | %E         | n.a. | 6.5  | 9.5  | 18.2 |
| M              | TS27 × TS21   | Ov/Be      | 2.3  | 2.3  | n.a. | n.a. |
|                |               | %E         | 8.0  | 11.6 | n.a. | n.a. |
| M              | TS27 × TS32   | Ov/Be      | n.a. | 3.0  | 3.4  | 3.3  |
|                |               | %E         | n.a. | 12.1 | 11.8 | 7.5  |
| M              | TS28 × TS04   | Ov/Be      | 1.2  | n.a. | n.a. | 1.2  |
|                |               | %E         | 15.6 | n.a. | n.a. | 20.0 |
| M              | TS28 × TS13   | Ov/Be      | 1.1  | n.a. | n.a. | 1.0  |
|                |               | %E         | 11.5 | n.a. | n.a. | 17.1 |
| ML             | TS04 × TS24   | Ov/Be      | 2.3  | 2.6  | 1.6  | n.a. |
|                |               | %E         | 0.8  | 0.9  | 1.0  | n.a. |
| ML             | TS23 × TS24   | Ov/Be      | n.a. | 2.5  | 2.4  | n.a. |
|                |               | %E         | n.a. | 14.8 | 20.1 | n.a. |
| ML             | TS23 × TS28   | Ov/Be      | n.a. | 2.5  | 1.5  | n.a. |
|                |               | %E         | n.a. | 20.6 | 23.3 | n.a. |
| ML             | TS33 × TS19   | Ov/Be      | n.a. | 2.6  | n.a. | 2.1  |
|                |               | %E         | n.a. | 6.7  | n.a. | 18.8 |
| ML             | TS33 × TS28   | Ov/Be      | n.a. | 2.2  | n.a. | 2.5  |
|                |               | %E         | n.a. | 13.4 | n.a. | 27.6 |
| ML             | TS37 × TS19   | Ov/Be      | n.a. | 2.3  | n.a. | 2.2  |
|                |               | %E         | n.a. | 9.0  | n.a. | 14.7 |
| L              | TS05 × TS27   | Ov/Be      | n.a. | 2.2  | 1.7  | n.a. |
|                |               | %E         | n.a. | 15.4 | 22.4 | n.a. |
| L              | TS09 × TS04   | Ov/Be      | 2.5  | n.a. | 2.2  | n.a. |
|                |               | %E         | 7.0  | n.a. | 5.6  | n.a. |
| L              | TS09 × TS10   | Ov/Be      | n.a. | 2.5  | n.a. | 1.9  |
|                |               | %E         | n.a. | 9.6  | n.a. | 1.6  |
| L              | TS09 × TS13   | Ov/Be      | n.a. | 2.3  | n.a. | 2.4  |
|                |               | %E         | n.a. | 16.1 | n.a. | 22.0 |

|   |             |       |      |     |      |      |
|---|-------------|-------|------|-----|------|------|
| L | TS25 × TS13 | Ov/Be | n.a. | 2.1 | n.a. | 1.4  |
|   |             | %E    | n.a. | 0.9 | n.a. | 3.9  |
| L | TS25 × TS18 | Ov/Be | n.a. | 1.9 | 2.2  | n.a. |
|   |             | %E    | n.a. | 1.6 | 1.2  | n.a. |
| L | TS25 × TS39 | Ov/Be | n.a. | 1.2 | n.a. | 1.5  |
|   |             | %E    | n.a. | 1.9 | n.a. | 2.6  |

\*: M: Middle; ML: Middle-Late; L: Late

\*\*I: 43-47 DAP harvest; II: 48-52 DAP harvest; III: 53-57 DAP harvest; IV: 58-62 DAP harvest.

**Supplementary material Table S2.** Composition of medium used for ovules establishment.

| Components                                                                       | Quantity    |
|----------------------------------------------------------------------------------|-------------|
| <b>Nitsch J.P Macroelements [45]</b>                                             |             |
| Ammonium nitrate (NH <sub>4</sub> NO <sub>3</sub> )                              | 0.720 g/l   |
| Calcium chloride (CaCl <sub>2</sub> ·2H <sub>2</sub> O)                          | 0.166 g/l   |
| Magnesium sulphate heptahydrate (MgSO <sub>4</sub> ·7H <sub>2</sub> O)           | 0.185 g/l   |
| Potassium nitrate (KNO <sub>3</sub> )                                            | 0.950 g/l   |
| Potassium phosphate monobasic (KH <sub>2</sub> PO <sub>4</sub> )                 | 0.068 g/l   |
| <b>Nitsch&amp;Nitsch's Microelements [45]</b>                                    |             |
| Manganese sulphate monohydrate (MnSO <sub>4</sub> ·H <sub>2</sub> O)             | 25.0 mg/l   |
| Copper sulphate pentahydrate (CuSO <sub>4</sub> ·5H <sub>2</sub> O)              | 0.025mg/l   |
| Zinc sulphate heptahydrate (ZnSO <sub>4</sub> ·7H <sub>2</sub> O)                | 10.0 mg/l   |
| Boric acid (H <sub>3</sub> BO <sub>3</sub> )                                     | 10.0 mg/l   |
| Sodium molybdate dihydrate (Na <sub>2</sub> MoO <sub>4</sub> ·2H <sub>2</sub> O) | 0.25 mg/l   |
| <b>Iron chelate</b>                                                              |             |
| Iron sulfate (FeSO <sub>4</sub> )                                                | 50.00 mg/l  |
| Sodium EDTA (NaEDTA)                                                             | 50.50 mg/l  |
| <b>Hormones</b>                                                                  |             |
| GA3                                                                              | 2.00 mg/l   |
| IAA                                                                              | 3.00 mg/l   |
| <b>Nitsch&amp;Nitsch's vitamins (1969)</b>                                       |             |
| Myo-Inositol                                                                     | 100.00 mg/l |
| Thiamine hydrochloride                                                           | 0.5 mg/l    |
| Pyridoxine                                                                       | 0.5 mg/l    |
| Glycine                                                                          | 2.0 mg/l    |
| Nicotinic acid                                                                   | 5.0 mg/l    |
| Biotin                                                                           | 0.05 mg/l   |
| Folic acid                                                                       | 0.50 mg/l   |
| <b>Agar (Duchefa Biochemie phyto AGAR)</b>                                       | 6.50 g/l    |
| <b>Saccharose</b>                                                                | 20.00 g/l   |
| <b>Activated Charcoal</b>                                                        | 2.00 g/l    |
| <b>pH 5.8</b>                                                                    |             |

**Supplementary material Table S3.** Composition of the medium used for embryo growth.

| Components                                                                            | Quantity   |
|---------------------------------------------------------------------------------------|------------|
| <b>Quoirin Leipovre Macroelements (1977) [52]</b>                                     |            |
| Potassium nitrate ( $\text{KNO}_3$ )                                                  | 4.200 g/l  |
| Ammonium nitrate ( $\text{NH}_4\text{NO}_3$ )                                         | 0.800 g/l  |
| Magnesium sulphate heptahydrate ( $\text{MgSO}_4 \cdot 7\text{H}_2\text{O}$ )         | 0.720 g/l  |
| Potassium phosphate monobasic ( $\text{KH}_2\text{PO}_4$ )                            | 0.540 g/l  |
| Calcium nitrate tetrahydrate ( $\text{Ca}(\text{NO}_3)_2 \cdot 4\text{H}_2\text{O}$ ) | 0.068 g/l  |
| <b>Murashige&amp;Skoog Microelements (1962) [53]</b>                                  |            |
| Manganese sulphate monohydrate ( $\text{MnSO}_4 \cdot \text{H}_2\text{O}$ )           | 16.9 mg/l  |
| Zinc sulphate heptahydrate ( $\text{ZnSO}_4 \cdot 7\text{H}_2\text{O}$ )              | 8.6 mg /l  |
| Boric acid ( $\text{H}_3\text{BO}_3$ )                                                | 6.2 mg/l   |
| Copper sulphate pentahydrate ( $\text{CuSO}_4 \cdot 5\text{H}_2\text{O}$ )            | 0.025 mg/l |
| Cobalt chloride ( $\text{CoCl}_2 \cdot 6\text{H}_2\text{O}$ )                         | 0.025 mg/l |
| Sodium molybdate dihydrate ( $\text{Na}_2\text{MoO}_4 \cdot 2\text{H}_2\text{O}$ )    | 0.25 mg/l  |
| Potassium iodide (KI)                                                                 | 0.83 mg/l  |
| <b>Iron chelate</b>                                                                   |            |
| Iron sulfate ( $\text{FeSO}_4$ )                                                      | 50.0 mg/l  |
| Sodium (EDTA NaEDTA)                                                                  | 55.0 mg/l  |
| <b>Vitamins Z4</b>                                                                    |            |
| Inositol                                                                              | 10.00 g/l  |
| Thiamine                                                                              | 0.10 g/l   |
| Pyridoxine                                                                            | 0.05 g/l   |
| Glycine                                                                               | 0.20 g/l   |
| Nicotinic acid                                                                        | 0.05 g/l   |
| Ascorbic acid                                                                         | 1.00 g/l   |
| Citric acid                                                                           | 1.00 g/l   |
| <b>Agar (Duchefa Biochemie phyto AGAR)</b>                                            | 6.50 g/l   |
| <b>Saccharose</b>                                                                     | 20.00 g/l  |
| <b>pH 5.7-5.8</b>                                                                     |            |
